# Supplementary material for: Antimicrobial activity of Lactobacillus spp. isolated from fermented foods and their inhibitory effect against foodborne pathogens
Source: PeerJ journal article supplement (doi:10.7717/peerj.18541), 2025-01-06
Supplement: GraphicalAbstract.pdf [file GraphicalAbstract.pdf]

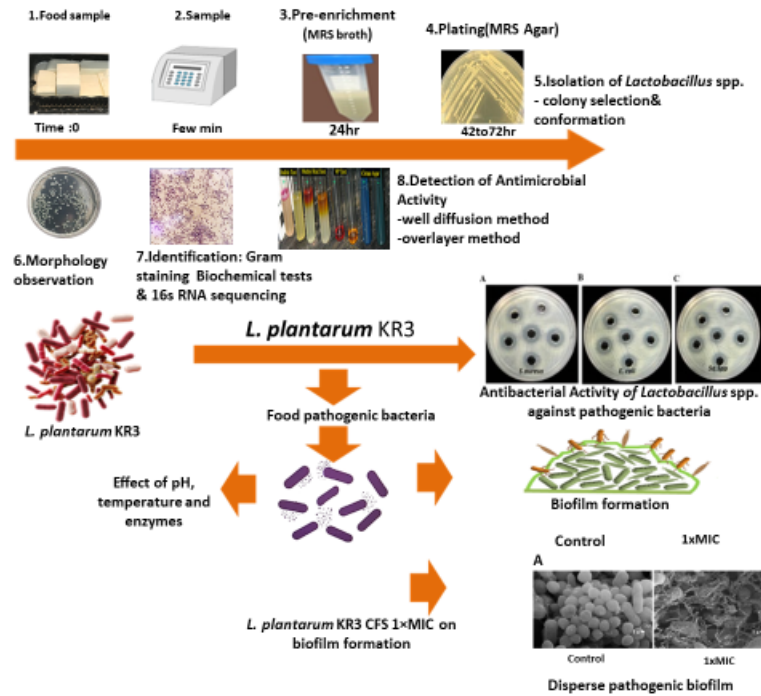

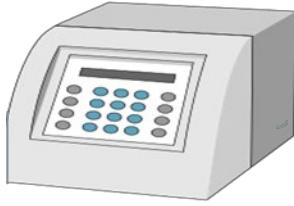

Image: File:202406 Homogenizer.svg by DataBase Center for Life Science (DBCLS), used under CC BY 4.0. Modified by Athraa. Original source: DOI <https://doi.org/10.7875/togopic.2024.147>.

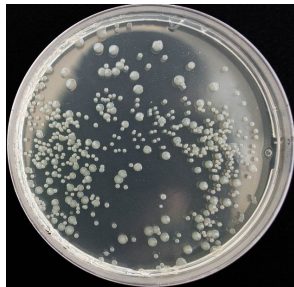

Image by Nadya il from Pixabay, used under the Pixabay license.

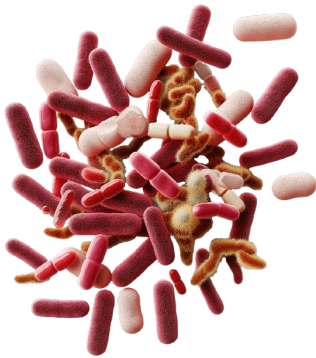

Image of Lactobacillus and Bifidobacterium by PNGTree, used under license.

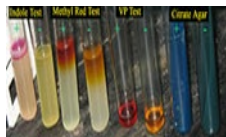

The IMViC Results image originates from work conducted at Acharya Prafulla Chandra College, New Barrackpur, West Bengal, India. It is licensed under CC BY-SA 3.0 via Wikimedia Commons.

<https://w.wiki/CKLF>
