# Supplementary material for: Antimicrobial activity of Lactobacillus spp. isolated from fermented foods and their inhibitory effect against foodborne pathogens
Source: PeerJ. 2025 Jan 6;13:e18541. doi: 10.7717/peerj.18541 (PMC11716013; doi:10.7717/peerj.18541)
Supplement: Supplemental Information 2 — The inhibition zones (mm) formed by the cell-free supernatant (CFS) of Lactobacillus plantarum against three foodborne pathogens: S. aureus, E. coli, and Salmonella spp. The control samples represent each pathogen without CFS treatment. [file peerj-13-18541-s002.xlsx]

## Sheet: Antibacterail activity
CFS	Inhibition zone(mm)				CFS	Inhibition zone(mm)			CFS	Inhibition zone(mm)
Control	S.aureus				Control	E.coli			Control	Salmonella spp
1.3	22				1.2	23			1.3	17.1
1.1	18				1.2	23.1			1.2	20
1.1	17.9				1.1	20.2			1.3	17
