# Supplementary material for: Antimicrobial activity of Lactobacillus spp. isolated from fermented foods and their inhibitory effect against foodborne pathogens
Source: PeerJ. 2025 Jan 6;13:e18541. doi: 10.7717/peerj.18541 (PMC11716013; doi:10.7717/peerj.18541)
Supplement: Supplemental Information 3 — The inhibition zones (mm) formed by the cell-free supernatant (CFS) of Lactobacillus plantarum against a selected pathogen, after being subjected to different temperature treatments (25 °C, 40 °C, 60 °C, 8°C, and 100 °C). The inhibition zones indicate the antimicrobial activity of the CFS across varying temperatures, compared to the untreated control (CFS without temperature modification). [file peerj-13-18541-s003.xlsx]

## Sheet: Sheet1
CFS	Inhibition zone (mm)			CFS	Inhibition zone (mm)			CFS	Inhibition zone (mm)			CFS	Inhibition zone (mm)			CFS	Inhibition zone (mm)
Control	Temp.25			Control	Temp.40			Control	Temp.60			Contro	Temp.80			Control	Temp.100
26	26			26	25.1			26	25.1			26	24.1			26	24
25	25.13			25	24.1			25	24.1			25	23.1			25	23.13
26	26.1			26	25.2			26	25.2			26	24.2			26	24.1
