# Supplementary material for: Antimicrobial activity of Lactobacillus spp. isolated from fermented foods and their inhibitory effect against foodborne pathogens
Source: PeerJ. 2025 Jan 6;13:e18541. doi: 10.7717/peerj.18541 (PMC11716013; doi:10.7717/peerj.18541)
Supplement: Supplemental Information 4 — The inhibition zones (mm) produced by the cell-free supernatant (CFS) of Lactobacillus plantarum against a selected pathogen under varying pH conditions (pH 2, 4, 6, 8, and 10). The inhibition zones are compared to a control sample (CFS without pH adjustment). [file peerj-13-18541-s004.xlsx]

## Sheet: Sheet1 pH
CFS	Innibition zone (mm)			CFS	Innibition zone (mm)			CFS	Innibition zone (mm)			CFS	Innibition zone (mm)			CFS	Innibition zone (mm)
Control	PH2			Control	PH4			Control	PH6			Control	PH8			Control	PH10
26	26			26	25.15			26	24.15			26	19.13			26	16.1
25	25			25	25.8			25	24.8			25	20.3			25	17.2
26	26.1			26	25.21			26	24.21			26	19			26	16.2
