# Supplementary material for: Antimicrobial activity of Lactobacillus spp. isolated from fermented foods and their inhibitory effect against foodborne pathogens
Source: PeerJ. 2025 Jan 6;13:e18541. doi: 10.7717/peerj.18541 (PMC11716013; doi:10.7717/peerj.18541)
Supplement: Supplemental Information 5 — The inhibition zones measured(mm) formed by the cell-free supernatant (CFS) of Lactobacillus plantarum after treatment with three different enzymes proteinase K, pepsin, and lysozyme. The antimicrobial activity of the CFS, as indicated by the inhibition zones, is compared with untreated control samples. [file peerj-13-18541-s005.xlsx]

## Sheet: CFS-Enzymes
CFS	Inhibition zone (mm)			CFS	Inhibition zone (mm)			CFS	Inhibition zone (mm)
control	proteinase K			control	pepsin			control	Lysozyme
24	18.1			24	11			24	23.1
24	18			24	11.1			24	23
25	17.1			25	12			25	24
