# Supplementary material for: Antimicrobial activity of Lactobacillus spp. isolated from fermented foods and their inhibitory effect against foodborne pathogens
Source: PeerJ. 2025 Jan 6;13:e18541. doi: 10.7717/peerj.18541 (PMC11716013; doi:10.7717/peerj.18541)
Supplement: Supplemental Information 6 — The optical density (OD595) measurements, indicating the biofilm formation of Staphylococcus aureus in the presence of cell-free supernatant (CFS) from Lactobacillus plantarum at a concentration of 1x MIC. The data compares biofilm formation in a control group (without CFS) to groups treated with 1x MIC of CFS from three different experiments (1x MIC-1, 1x MIC-2, and 1x MIC-3). Similarly, another table shows the OD595 measurements for biofilm formation of S. aureus with CFS at 2x MIC, comparing the control group to three experiments (2x MIC-1, 2x MIC-2, and 2x MIC-3). [file peerj-13-18541-s006.xlsx]

## Sheet: Sheet1
	S.aureus	OD595	OD595	OD595			S.aureus	OD595	OD595	OD595
wthout cfs	Control	1xMIC-1	1xMIC-3	1xMIC-3		without cfs	control	2xMIC-1	2xMIC-2	2xMIC-3	experiments
	0.98	0.319	0.359	0.382			0.98	0.597	0.698	0.599
	0.93	0.305	0.328	0.434			0.92	0.598	0.597	0.674
	0.91	0.371	0.373	0.315			0.98	0.389	0.698	0.585
