# Supplementary material for: Antimicrobial activity of Lactobacillus spp. isolated from fermented foods and their inhibitory effect against foodborne pathogens
Source: PeerJ. 2025 Jan 6;13:e18541. doi: 10.7717/peerj.18541 (PMC11716013; doi:10.7717/peerj.18541)
Supplement: Supplemental Information 7 — The optical density (OD595) measurements indicating E. coli biofilm formation under different treatment conditions with Lactobacillus plantarum KR3 cell-free supernatant (CFS). The data includes OD595 values for a control group (no CFS treatment) and three experimental replicates of CFS at both 1x and 2x minimum inhibitory concentrations (MIC). Specifically, the table shows measurements for the control and three replicates of 1x MIC (1xMIC-1, 1xMIC-2, 1xMIC-3) as well as the control and three replicates of 2x MIC (2xMIC-1, 2xMIC-2, 2xMIC-3). The control values represent baseline biofilm formation without treatment, while the 1x and 2x MIC treatments assess the effects of varying concentrations of CFS on biofilm development. [file peerj-13-18541-s007.xlsx]

## Sheet: Sheet1
	E.coli	OD595	OD595	OD595			E.coli	OD595	OD595	OD595
without cfs	Control	1xMIC-1	1xMIC-2	1xMIC-3		without cfs	Control	2xMIC-1	2xMIC-2	2xMIC-3	experiments
	0.97	0.239	0.125	0.237			0.97	0.434	0.525	0.541
	0.91	0.146	0.201	0.126			0.93	0.331	0.627	0.535
	0.99	0.117	0.172	0.136			0.93	0.429	0.525	0.443
